# Supplementary material for: Occupation-specific risk estimates for suicide and non-fatal self-harm from a Swedish cohort of male construction workers followed 1987–2018
Source: HighWire-hosted journal article supplement (doi:10.1136/oemed-2023-109246), 2024-02-28
Supplement: oemed-2023-109246supp001_data_supplement.pdf [file oemed-2023-109246supp001_data_supplement.pdf]

**SUPPLEMENT****Table S1:** Definition of analytic sample

|             |                                                                |
|-------------|----------------------------------------------------------------|
| N = 389 132 | Exclusions                                                     |
|             | Women (n = 19 418)                                             |
| N = 369 714 |                                                                |
|             | Age at baseline examination > 64 years (n = 6843)              |
| N = 362 871 |                                                                |
|             | Occupation not reported at any health examination (n = 18 436) |
| N = 344 435 |                                                                |
|             | Age > 64 years before 1987 (n = 40 963)                        |
| N = 303 472 |                                                                |
|             | Death before 1987 (n = 4548)                                   |
| N = 298 924 |                                                                |
|             | Emigration between last health examination and 1987 (n = 2033) |
| N = 296 891 |                                                                |

**Table S2:** Occupation registered at last health examination and risk for incident suicidal behavior

| Occupation at last health visit      | Suicide<br>(n = 296 352)  |                                 | Non-fatal self-harm<br>(n = 294 156) |                                 |
|--------------------------------------|---------------------------|---------------------------------|--------------------------------------|---------------------------------|
|                                      | All cases<br>(n = 1618)   | With known intent<br>(n = 1309) | All cases<br>(n = 4647)              | With known intent<br>(n = 2086) |
|                                      | HR (95% CI) <sup>ab</sup> | HR (95% CI) <sup>ab</sup>       | HR (95% CI) <sup>a</sup>             | HR (95% CI) <sup>a</sup>        |
| Road construction worker             | 1.31 (0.91, 1.90)         | 1.19 (0.78, 1.82)               | 1.02 (0.80, 1.31)                    | 1.28 (0.90, 1.81)               |
| Rock worker                          | 1.48 (0.95, 2.30)         | 1.77 (1.12, 2.80)*              | 1.28 (0.92, 1.78)                    | 1.14 (0.69, 1.88)               |
| Laborer                              | 1.43 (1.15, 1.80)**       | 1.40 (1.09, 1.80)**             | 1.08 (0.92, 1.27)                    | 1.07 (0.85, 1.35)               |
| Concrete worker                      | 1.10 (0.93, 1.31)         | 1.00 (0.82, 1.22)               | 1.19 (1.07, 1.32)**                  | 1.23 (1.05, 1.43)**             |
| Carpenter                            | 0.99 (0.87, 1.13)         | 0.99 (0.86, 1.14)               | 1.00 (0.93, 1.08)                    | 0.94 (0.84, 1.06)               |
| Bricklayer                           | 1.27 (0.98, 1.65)         | 1.13 (0.83, 1.54)               | 0.89 (0.74, 1.07)                    | 1.10 (0.86, 1.41)               |
| Floor-layer                          | 0.83 (0.57, 1.21)         | 0.86 (0.57, 1.30)               | 1.10 (0.90, 1.33)                    | 1.08 (0.80, 1.45)               |
| Glazier                              | 0.95 (0.58, 1.56)         | 0.85 (0.47, 1.53)               | 1.15 (0.87, 1.51)                    | 1.45 (1.02, 2.07)*              |
| Insulation worker                    | 1.07 (0.67, 1.71)         | 1.08 (0.64, 1.82)               | 0.97 (0.72, 1.31)                    | 0.99 (0.65, 1.53)               |
| Sheet-metal worker                   | 1.18 (0.94, 1.47)         | 1.08 (0.84, 1.40)               | 1.23 (1.08, 1.40)**                  | 1.25 (1.03, 1.51)*              |
| Roofer                               | 1.69 (1.01, 2.84)*        | 1.63 (0.91, 2.94)               | 1.41 (0.99, 2.01)                    | 1.25 (0.71, 2.18)               |
| Pipe fitter, plumber                 | 0.98 (0.81, 1.18)         | 0.97 (0.79, 1.19)               | 1.08 (0.97, 1.21)                    | 1.15 (0.98, 1.34)               |
| Painter                              | 1.16 (0.97, 1.38)         | 1.18 (0.97, 1.43)               | 1.14 (1.03, 1.27)*                   | 1.41 (1.22, 1.62)***            |
| Machine operator                     | 0.90 (0.69, 1.18)         | 0.86 (0.63, 1.17)               | 0.90 (0.76, 1.08)                    | 0.85 (0.65, 1.11)               |
| Crane operator                       | 1.15 (0.73, 1.82)         | 1.12 (0.67, 1.88)               | 1.11 (0.80, 1.53)                    | 1.12 (0.70, 1.79)               |
| Driver                               | 0.43 (0.23, 0.80)**       | 0.48 (0.25, 0.93)*              | 1.06 (0.81, 1.39)                    | 1.03 (0.69, 1.52)               |
| Refrigeration mechanic               | 1.49 (0.85, 2.60)         | 1.50 (0.81, 2.78)               | 0.88 (0.58, 1.33)                    | 0.86 (0.47, 1.60)               |
| Reparation mechanic                  | 0.81 (0.46, 1.41)         | 0.83 (0.45, 1.53)               | 0.86 (0.61, 1.22)                    | 0.82 (0.49, 1.37)               |
| Electrician                          | 0.77 (0.65, 0.91)**       | 0.81 (0.68, 0.97)               | 0.71 (0.64, 0.78)***                 | 0.57 (0.49, 0.67)***            |
| Other construction work <sup>c</sup> | 1.16 (0.96, 1.41)         | 1.26 (1.02, 1.55)*              | 1.13 (1.01, 1.26)*                   | 1.20 (1.01, 1.41)*              |
| Foreman                              | 0.57 (0.47, 0.70)***      | 0.61 (0.49, 0.75)***            | 0.64 (0.57, 0.72)***                 | 0.49 (0.40, 0.60)***            |
| Clerk, employee                      | 0.50 (0.37, 0.68)***      | 0.53 (0.38, 0.74)***            | 0.63 (0.52, 0.76)***                 | 0.56 (0.42, 0.75)***            |

<sup>a</sup> Cox proportional hazard regression adjusted for age, year, and region (ref=overall mean)

<sup>b</sup> Further adjusted for self-harm before baseline

<sup>c</sup> Scaffold builder, welder, blacksmith etc.

\* p <.05, \*\* p <.01, \*\*\* p <.001
